# Supplementary material for: ROS-responsive thermosensitive polypeptide hydrogels for localized drug delivery and improved tumor chemoimmunotherapy
Source: Royal Society of Chemistry journal article supplement (doi:10.1039/d4bm00241e), 2024-01-01
Supplement: d4bm00241e11.pdf [file d4bm00241e11.pdf]

## Supporting Information

# ROS-responsive thermosensitive polypeptide hydrogels for localized drug delivery and improved tumor chemoimmunotherapy

*Fujiang Li<sup>†,§</sup>, Junfeng Ding<sup>†,§</sup>, Zhenyu Li<sup>†,§</sup>, Yan Rong<sup>\*,†</sup>, Chaoliang He<sup>\*,†,§</sup>, Xuesi Chen<sup>†,§</sup>*

<sup>†</sup>CAS Key Laboratory of Polymer Ecomaterials, Changchun Institute of Applied Chemistry, Chinese Academy of Sciences, Changchun 130022, China

<sup>§</sup>School of Applied Chemistry and Engineering, University of Science and Technology of China, Hefei 230026, China

Corresponding author,

\*Email: yrong@ciac.ac.cn (Y. Rong), clhe@ciac.ac.cn (C. He)

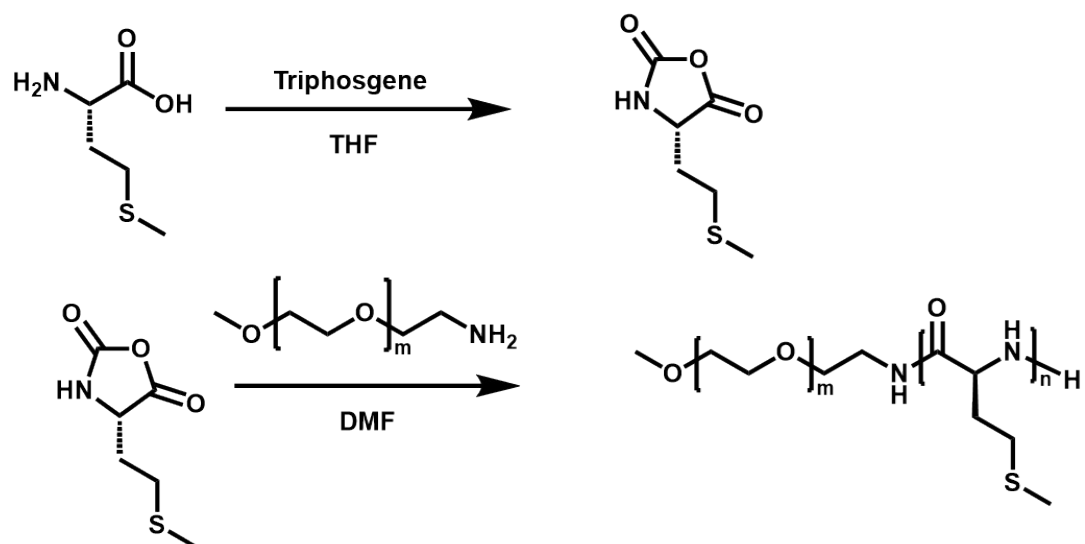

**Scheme S1.** Synthesis route of the mPEG-*b*-PMet.

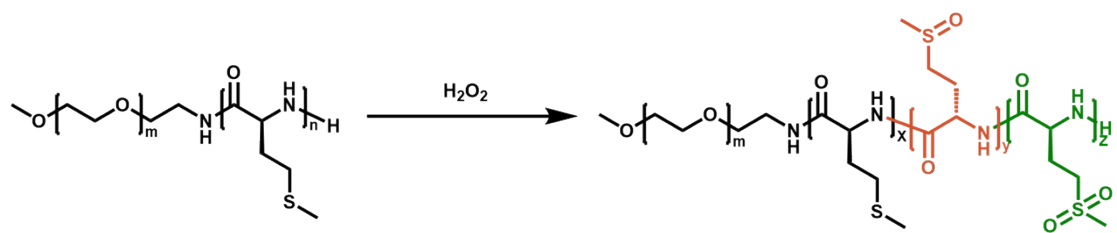

**Scheme S2.** Oxidation route of the mPEG-*b*-PMet.

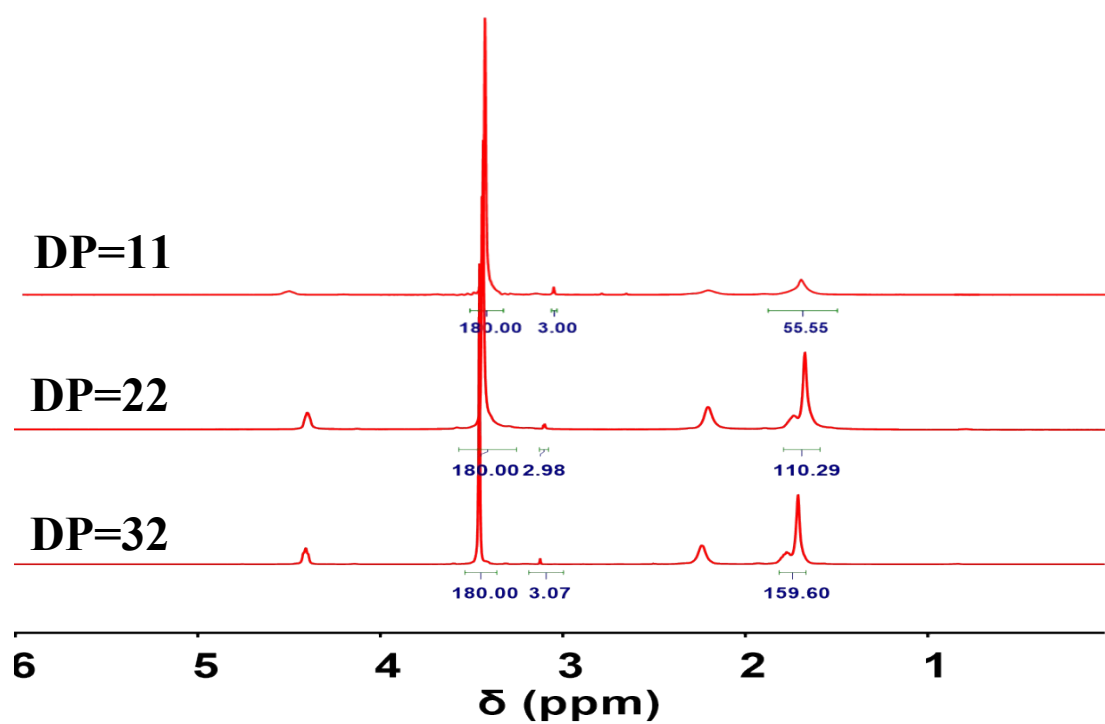

**Figure S1.**  $^1\text{H}$  NMR spectra of different degrees of polymerization of three polymers.

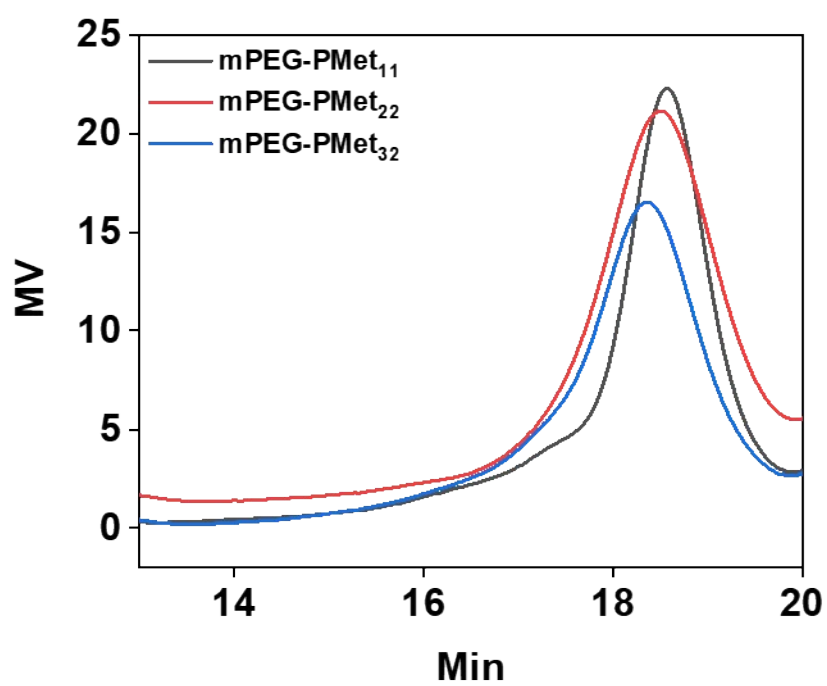

**Figure S2.** Gel permeation chromatography (GPC) of different polymerization degree of polymers.

---

**Table S1.** The  $M_n$  and PDI of Gel permeation chromatography (GPC) of different polymerization degree of polymers.

| Polymers   | mPEG-PMet <sub>11</sub> | mPEG-PMet <sub>22</sub> | mPEG-PMet <sub>32</sub> |
|------------|-------------------------|-------------------------|-------------------------|
| $M_n$ (Da) | 5511                    | 5650                    | 6320                    |
| PDI        | 1.12                    | 1.11                    | 1.16                    |

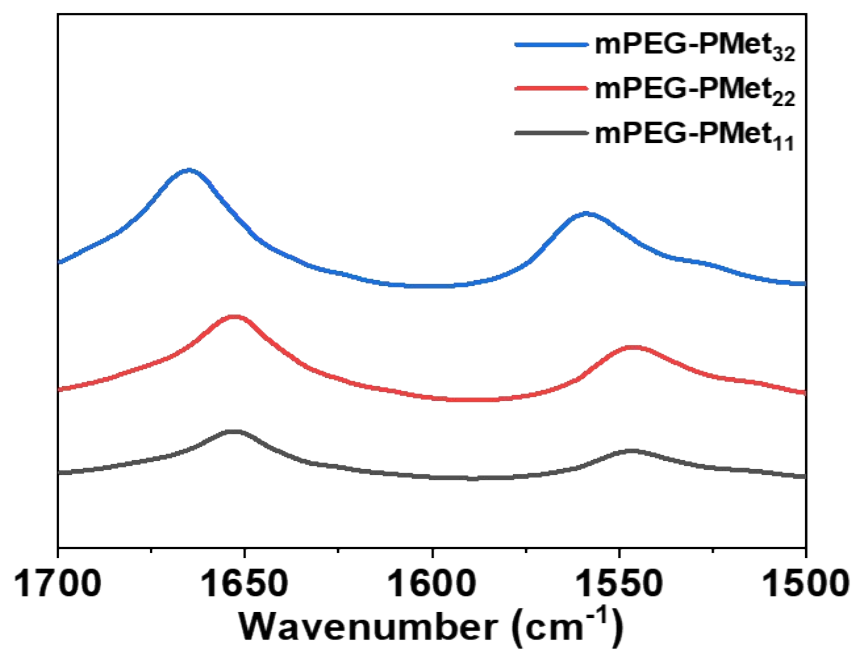

**Figure S3.** The FTIR spectra of different degrees of polymerization of the copolymers.

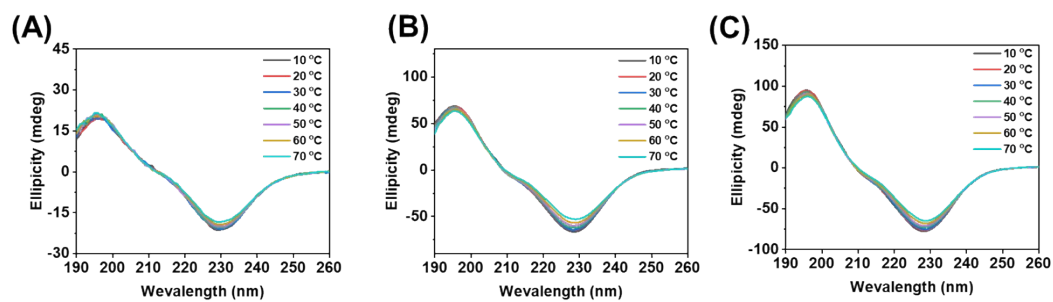

**Figure S4.** The CD spectra of mPEG-*b*-PMet<sub>11</sub> A), mPEG-*b*-PMet<sub>22</sub> B), mPEG-*b*-PMet<sub>32</sub> C) at different temperature.

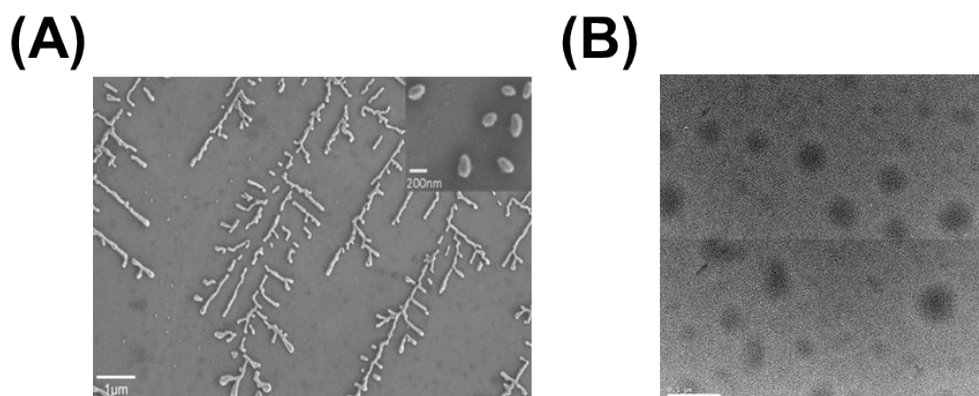

**Figure S5.** (A) SEM image of self-assembled nanoparticles of 1 mg/mL mPEG-*b*-PMet<sub>22</sub>. (B) TEM image of self-assembled nanoparticles of 0.1 mg/mL mPEG-*b*-PMet<sub>22</sub>. The scale bar in the TEM image represents 500 nm.

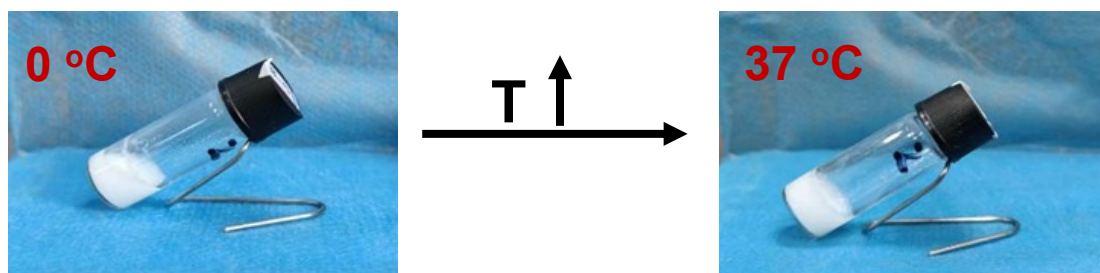

**Figure S6.** The representative pictures of sol-gel phase transitions of the 8.0 wt% mPEG-*b*-PMet<sub>22</sub> hydrogels *in vitro*

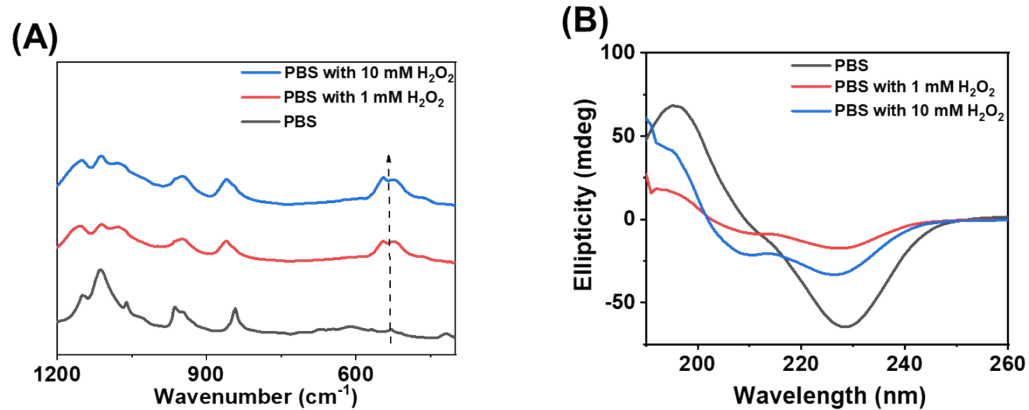

**Figure S7.** The FTIR spectra A) and the CD spectra B) of the post-oxidation copolymers.

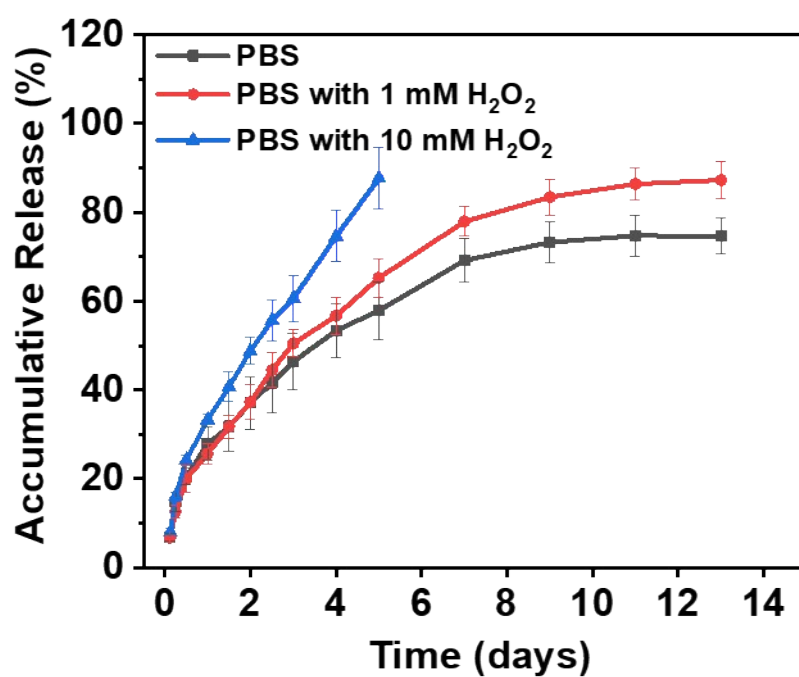

**Figure S8.** The release behaviors of Cy3-IgG from the hydrogel formed by 8.0 wt% mPEG-*b*-PMet<sub>22</sub> evaluated hydrogen peroxide *in vitro* (n = 3).

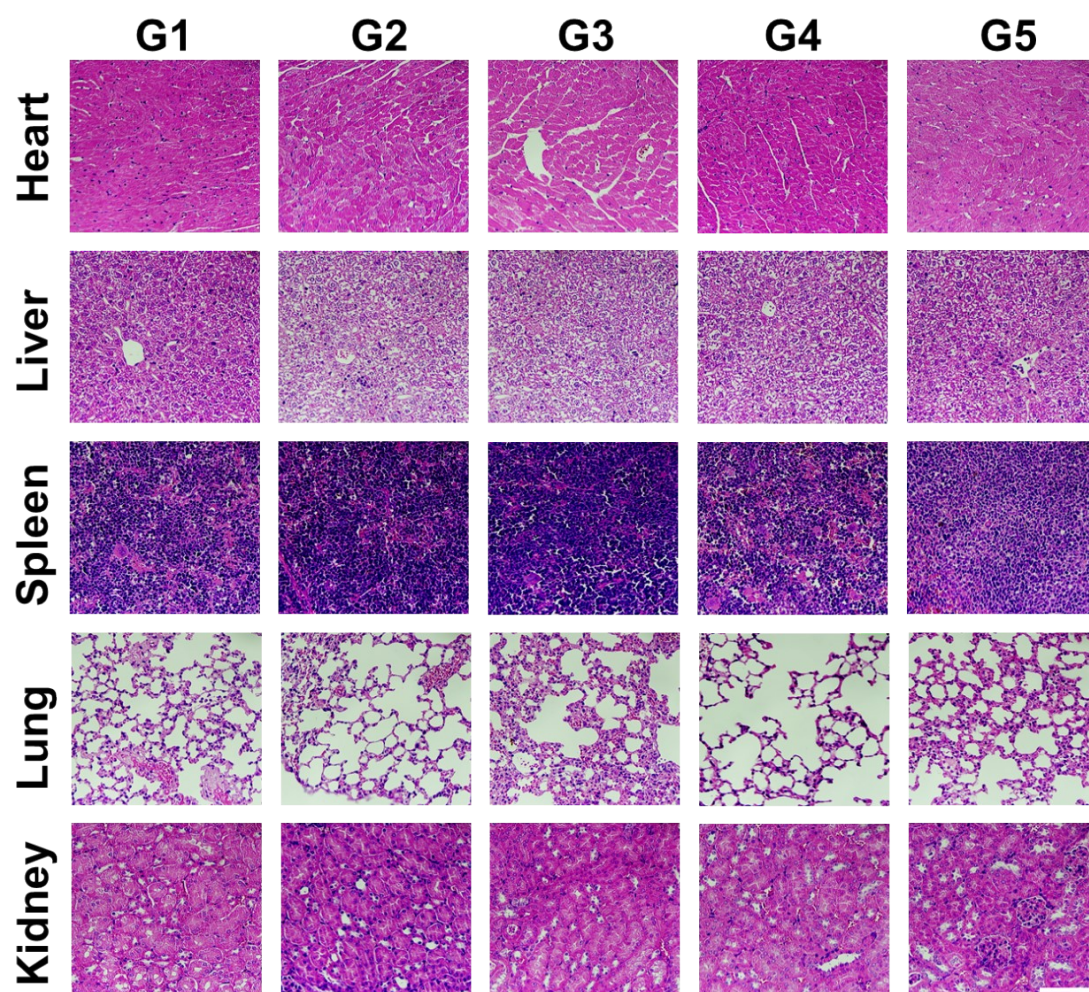

**Figure S9.** Histological analysis of major organs of B16F10-bearing mice with different treatments at day 10. Scale bar = 100  $\mu$ m, G1: PBS, G2: Free Dox/R848/aPD-1, G3: Dox@Gel, G4: Dox/R848@Gel, G5: Dox/R848/aPD-1@Gel.

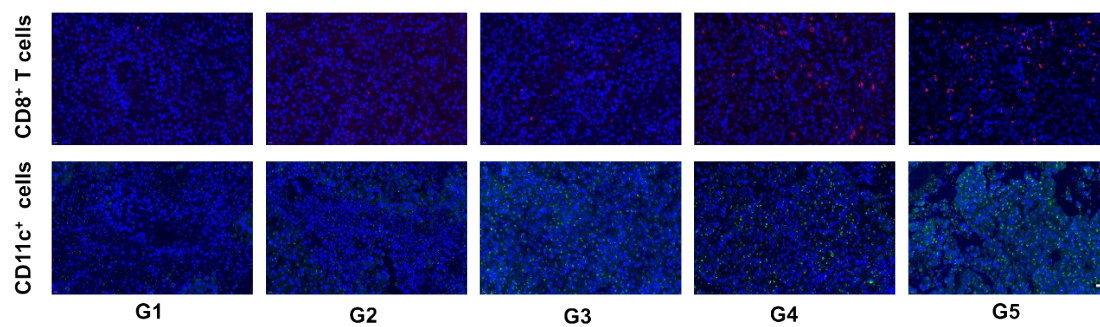

**Figure S10.** Immunohistochemistry images of CD11c<sup>+</sup> cells and CD8<sup>+</sup> T cells in tumor tissues via CSLM, (scale bar=2  $\mu$ m), G1: PBS, G2: Free Dox/R848/aPD-1, G3: Dox@Gel, G4: Dox/R848@Gel, G5: Dox/R848/aPD-1@Gel.
