# Supplementary material for: ROS-responsive thermosensitive polypeptide hydrogels for localized drug delivery and improved tumor chemoimmunotherapy
Source: Royal Society of Chemistry journal article supplement (doi:10.1039/d4bm00241e), 2024-01-01
Supplement: d4bm00241e13.pdf [file d4bm00241e13.pdf]

Electronic Supplementary Material (ESI) for Biomaterials Science.  
This journal is © The Royal Society of Chemistry 2024
