# Supplementary figures and images for: ROS-responsive thermosensitive polypeptide hydrogels for localized drug delivery and improved tumor chemoimmunotherapy
Source: Royal Society of Chemistry journal article supplement (doi:10.1039/d4bm00241e), 2024-01-01

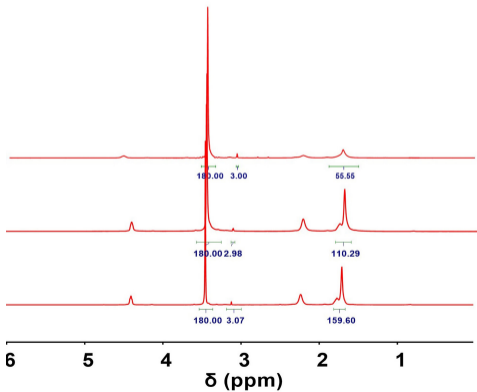

Supplement: d4bm00241e1.pdf [file d4bm00241e1.pdf]

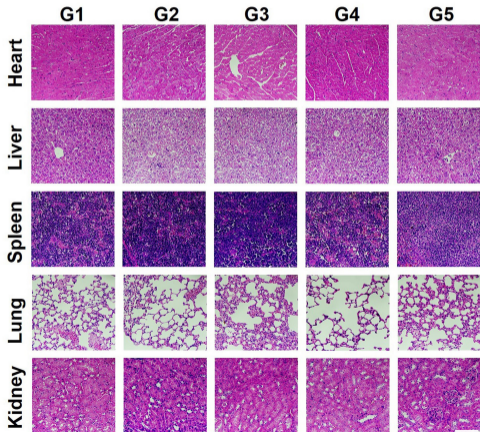

Supplement: d4bm00241e10.pdf [file d4bm00241e10.pdf]

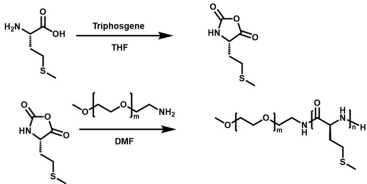

Supplement: d4bm00241e12.pdf [file d4bm00241e12.pdf]

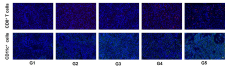

Supplement: d4bm00241e2.pdf [file d4bm00241e2.pdf]

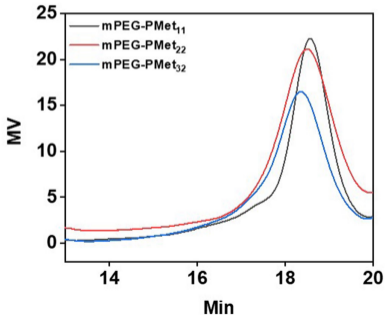

Supplement: d4bm00241e3.pdf [file d4bm00241e3.pdf]

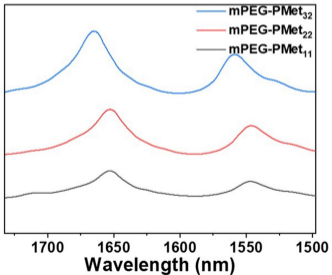

Supplement: d4bm00241e4.pdf [file d4bm00241e4.pdf]

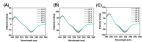

Supplement: d4bm00241e5.pdf [file d4bm00241e5.pdf]

**(A)**

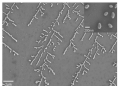

**(B)**

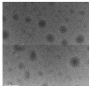

Supplement: d4bm00241e6.pdf [file d4bm00241e6.pdf]

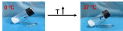

Supplement: d4bm00241e7.pdf [file d4bm00241e7.pdf]

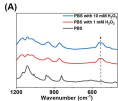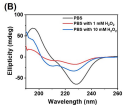

Supplement: d4bm00241e8.pdf [file d4bm00241e8.pdf]

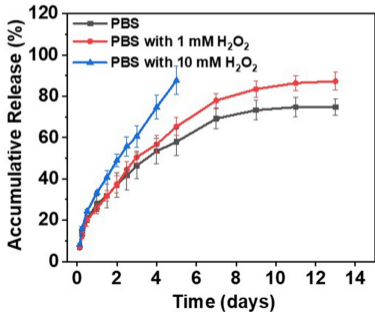

Supplement: d4bm00241e9.pdf [file d4bm00241e9.pdf]
